# Supplementary material for: High precision analysis of potassium stable isotopes using the collision/reaction cell Neoma MC-ICPMS/MS
Source: Royal Society of Chemistry journal article supplement (doi:10.1039/d4ja00133h), 2024-01-01
Supplement: d4ja00133h1.xlsx [file d4ja00133h1.xlsx]

## Sheet: Table S1
Table S1. K isotopeic analyses of in-house standard solution at various K concentrations.
K concentration*	39K intensity	δ41K	σ	n	95% ci
[ppb]	[V]	[‰]	[‰]		[‰]
500	71.4	-0.00207669	0.0559796	18	0.026389
250	59.56	-0.00354499	0.0322501	10	0.0203968
200	40.97	-0.00120892	0.118609	21	0.0517653
150	28.59	0.0040172	0.0659158	11	0.0397487
100	19.56	0.00228445	0.0554124	24	0.022622
50	8.58	0.00114888	0.0533547	14	0.0285193
*Each solution was measured against itself.

## Sheet: Table S2
Table S2. Test of the effect of concentration mismatch on the measured K isotopic compositions.
K concentration	C/Cstd*	C/Cstd	Conc. mismatch	δ41K	σ	n	95% ci
nominal [ppb]	nominal	measured	(C/Cstd -1)*100 [%]	[‰]	[‰]		[‰]
300	1	1	0	-8.73525e-06	0.0591311	11	0.0356574
297	0.99	0.997	-0.3	-0.00101761	0.0789829	10	0.0373978
294	0.98	0.991	-0.9	-0.021091	0.0450939	9	0.0346623
300	1	1	0	-0.00699435	0.0557168	19	0.0268546
303	1.01	1.0181	1.81	-0.00439598	0.031531	6	0.0330897
306	1.02	1.0249	2.49	-0.018262	0.0254713	7	0.0235571
300	1	1	0	-0.0197488	0.056537	12	0.0359219
294	0.98	0.981	-1.9	-0.0196695	0.0289415	6	0.0303723
285	0.95	0.951	-4.9	0.0273308	0.0511154	7	0.042738
300	1	1	0	-0.00459112	0.0616655	23	0.0266661
315	1.05	1.04856	4.85648	0.0332574	0.0486297	5	0.0551553
330	1.1	1.09855	9.85498	0.211596	0.0839986	8	0.059396
270	0.9	0.902096	-9.79041	0.0199596	0.0957011	15	0.0529975
*C and Cstd are the K concentrations of sample and standard, respectively. All measurements are relative to 300 ppb in-house standard solutions.

## Sheet: Table S3
Table S3. The effect of acid molarity mismatch on the measured K signal intensity and isotopic compositions.
K conc.	HNO3 molarity	Sample/Standard	δ41K	σ	n	95% ci
[ppb]		intensity ratio [V/V]	[‰]	[‰]		[‰]
Test 1
300	0.01	1.07427	3.1776	0.0796528	9	0.0612266
300	0.02	1.03935	1.26409	0.0871872	14	0.0503404
300	0.03	1	0.00487076	0.0781157	17	0.0378917
300	0.04	0.985133	-0.724357	0.08682	14	0.0501284
300	0.05	0.916306	-1.26684	0.112989	9	0.0868507
Test 2
300	0.01	1.02517	-5.14478	1.35041	9	1.03801
300	0.02	1.00681	-0.898714	0.102977	9	0.0791549
300	0.03	1	-8.73525e-06	0.0321497	11	0.0215984
300	0.04	0.980352	0.400929	0.15606	14	0.0901062
300	0.05	0.960295	1.29723	0.212491	7	0.196522

## Sheet: Table S4
Table S4. Test of the effect of impurities on the measured K isotopic compositions.
Element/K	Na			Mg			Fe			Ca
	δ41K [‰]	95% c.i. [‰]		δ41K [‰]	95% c.i. [‰]		δ41K [‰]	95% c.i. [‰]		δ41K [‰]	95% c.i. [‰]
0	-0.00122321	0.0250882		0.0030775	0.103252		-0.00473486	0.0569693		-0.00270661	0.0701076
0.01	0.0153457	0.0525717		0.0160691	0.0728739		-0.0191997	0.0766042		0.0206288	0.069224
0.02	-0.0517736	0.040669		0.0118434	0.0262089		-0.00947349	0.0566611		-0.0291209	0.125153
0.05	-0.138556	0.0480677		0.194323	0.0628128		-0.0188582	0.061309		0.135518	0.0537718
0.1	-0.133868	0.0393948		0.287821	0.0671541		-0.016665	0.0528143		0.204517	0.059201
